# Supplementary material
Source: PubMed Central journal article supplement (PMC5679414)
Supplement: supp_WNL.0000000000004629_Table_e-1.pdf [file supp_WNL.0000000000004629_Table_e-1.pdf]

| <b>Measure</b>                   | <b>Baseline Performance</b> | <b>Change in Performance</b> |
|----------------------------------|-----------------------------|------------------------------|
| <b>Visual Sensory</b>            |                             |                              |
| NVA                              | 108.9 (34.7, 183.2)**       | -82.5 (-179.1, 14.0)         |
| FVA                              | 46.5 (-30.4, 123.5)         | 50.0 (-15.7, 115.7)          |
| CS                               | -42.9 (-92.0, 6.1)          | 31.6 (-21.8, 85.0)           |
| <b>Visual Perception</b>         |                             |                              |
| <b>Attention UFOV</b>            | 0.0252 (-0.0141, 0.0646)    | 0.0583 (0.0193, 0.0974)**    |
| <b>Spatial JLO</b>               | -1.17 (-3.16, 0.82)         | -0.93 (-3.42, 1.55)          |
| <b>Motion SFM</b>                | 1.26 (-0.91, 3.43)          | -0.04 (-2.60, 2.51)          |
| <b>Visuospatial Construction</b> |                             |                              |
| BLOCKS                           | -0.22 (-1.16, 0.72)         | -0.79 (-1.97, 0.39)          |
| CFT-Copy                         | -1.40 (-3.66, 0.87)         | 0.43 (-1.48, 2.34)           |
| <b>Memory</b>                    |                             |                              |
| <b>Visual CFT-Recall</b>         | 0.81 (-0.81, 2.44)          | -0.23 (-1.84, 1.38)          |
| <b>Visual BVRT-error</b>         | 0.01 (-2.90, 2.92)          | 3.33 (1.14, 5.52)**          |
| <b>Verbal AVLT Recall</b>        | 0.02 (-2.20, 2.25)          | 0.28 (-4.39, 4.95)           |
| <b>Executive Functions</b>       |                             |                              |
| <b>Set Shifting TMT(B-A)</b>     | 0.25 (-0.14, 0.64)          | 0.196 (0.050, 0.342)*        |
| <b>Fluency COWA</b>              | -0.30 (-1.15, 0.56)         | -0.55 (-1.35, 0.26)          |
| <b>General Cognition</b>         |                             |                              |
| MMSE                             | -3.03 (-9.22, 3.16)         | -1.30 (-5.20, 2.60)          |
| COGSTAT                          | -0.062 (-0.239, 0.115)      | -0.373 (-0.565, -0.181)***   |
| <b>Sleepiness ESS</b>            | 1.41 (-0.23, 3.04)          | -0.59 (-2.49, 1.31)          |
| <b>Depression GDS</b>            | 0.69 (-1.29, 2.67)          | 0.40 (-2.01, 2.80)           |
| <b>Apathy present</b>            | 1.97 (-19.1, 23.1)          |                              |
| <b>Balance Functional Reach</b>  | 1.05 (-2.05, 4.16)          | 1.63 (-1.29, 4.54)           |
| <b>Parkinsonism</b>              |                             |                              |
| Duration                         | 0.34 (-0.44, 2.11)          | NA                           |
| Hoehn-Yahr                       | 1.6 (-14.7, 17.8)           | 0.1 (-10.4, 10.6)            |
| ADL-UPDRS                        | 1.58 (-1.48, 4.64)          | 2.33 (0.82, 3.84)**          |
| Motor-UPDRS                      | -0.005 (-0.947, 0.937)      | 0.080 (-0.762, 0.922)        |
| Schwab-England                   |                             | 0.22 (-0.29, 0.73)           |
| Levodopa/day                     | -0.0014 (-0.0178, 0.0151)   | -0.0083 (-0.0540, 0.0373)    |
| Dopamine agonist use             | 6.04 (-11.23, 23.34)        |                              |
| <b>Baseline Driving Features</b> |                             |                              |
| Crash within 1 year              | 10.3 (-14.0, 34.5)          |                              |
| Vehicle speed (mph)              | 1.36 (0.11, 2.62)*          |                              |

**Table e-1.** Regression coefficients for the baseline value and change in each variable in predicting final total road error counts after 2 year follow up within the PD group, while controlling for age, education, and baseline total error counts. Values represent the number of road error counts at 2-year follow up accounted for by 1 unit change in the predictors. For example, a 10-second prolongation (worsening) of the TMT(B-A) performance at follow-up resulted in an additional 1.96 (0.50, 3.42) errors at 2-year follow up, while a 100-millisecond prolongation (worsening) of UFOV at follow-up resulted in an additional 4.8 (1.9, 9.7) errors at follow up. \*p<0.05, \*\*p<0.01, \*\*\*p<0.001
